# Supplementary material for: Chicken (Gallus gallus) endogenous retrovirus generates genomic variations in the chicken genome
Source: Mob DNA. 2017 Jan 24;8:2. doi: 10.1186/s13100-016-0085-5 (PMC5260121; doi:10.1186/s13100-016-0085-5)
Supplement: Additional file 11: Table S7. — Condition for the PCR amplification of GGERV10B_311 element. (XLSX 11 kb) [file 13100_2016_85_MOESM11_ESM.xlsx]

## Sheet: Sheet1
Table S7. Condition for the PCR amplification of GGERV10B_311 element
Full-length	Location (galGal4)	GGERV10 Family	Forward Primer	Reverse Primer	Breeds	Size	Tm F	Tm R	anneling	Extension time
GGERV10_311	chr3:54250457-54254049	GGLTR10B	AAGCCAGTTTGGAAGGGGTG	CTGAATCTACCACAGCCGTGC	Korean domestic chicken	3593bp	63.6℃	63.1℃	57℃	4 min
					Araucana	200bp
					Leghorn	120bp
